# Supplementary material
Source: PubMed Central journal article supplement (PMC8807763)
Supplement: NIHMS1726552-supplement-Supplementary_Figure_4.pdf [file NIHMS1726552-supplement-Supplementary_Figure_4.pdf]

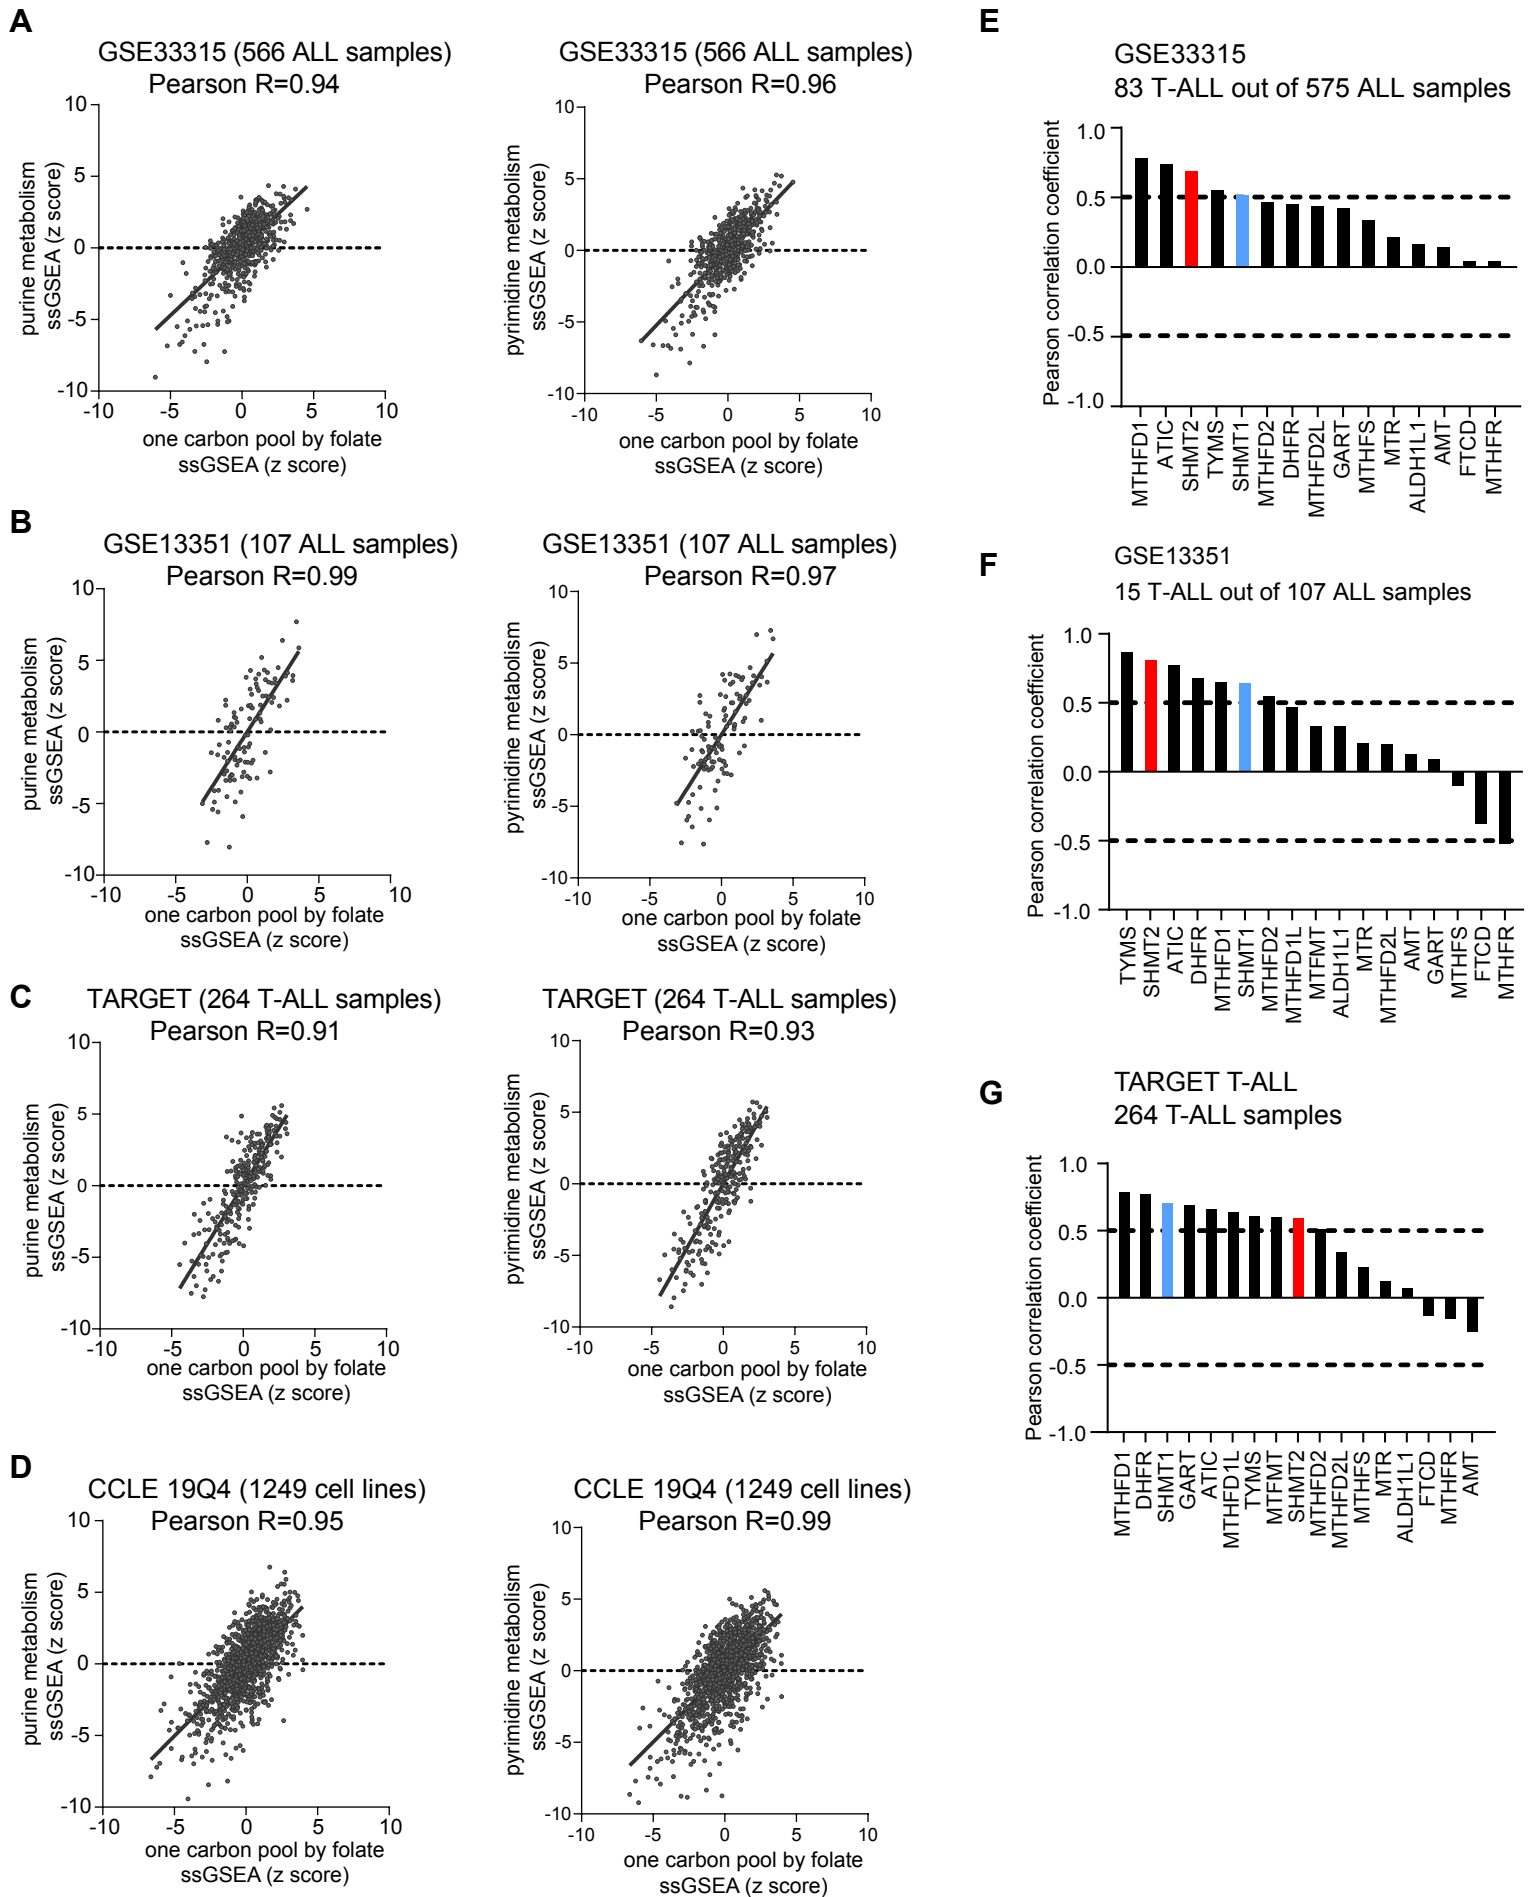

Supplementary Fig. 4
