# Supplementary material
Source: PubMed Central journal article supplement (PMC8807763)
Supplement: NIHMS1726552-supplement-Supplementary_Table_2.pdf [file NIHMS1726552-supplement-Supplementary_Table_2.pdf]

**Supplementary table 2A:** Genome-wide gene set enrichment results for Avana 19Q4 CERES dependency of T-ALL vs. nonT-ALL cell lines across the collection of KEGG pathways (MSigDB v7). Shown for each gene set are the normalized enrichment score (NES), the nominal P-value, the Benjamini-Hochberg False Discovery Rate (FDR), the size and the dependency status (depletion - negatively enriched, proliferation - positively enriched). Significance cutoffs:  $abs(NES) > 1.5$ , nominal P-value  $< 0.10$ , FDR  $< 0.25$ .

| #  | Gene set enrichment for CERES dependency of T-ALL vs. all other nonT-ALL cell lines | NES   | P-value | FDR    | Size gene set | Status    |
|----|-------------------------------------------------------------------------------------|-------|---------|--------|---------------|-----------|
| 1  | KEGG SYSTEMIC LUPUS ERYTHEMATOSUS                                                   | -2.46 | 0.0000  | 0.0000 | 111           | Depletion |
| 2  | KEGG RIBOSOME                                                                       | -2.44 | 0.0000  | 0.0000 | 85            | Depletion |
| 3  | KEGG PYRIMIDINE METABOLISM                                                          | -2.31 | 0.0000  | 0.0000 | 93            | Depletion |
| 4  | KEGG SPLICEOSOME                                                                    | -2.14 | 0.0000  | 0.0010 | 124           | Depletion |
| 5  | KEGG RNA POLYMERASE                                                                 | -2.09 | 0.0000  | 0.0008 | 26            | Depletion |
| 6  | KEGG NOTCH SIGNALING PATHWAY                                                        | -2.07 | 0.0000  | 0.0008 | 47            | Depletion |
| 7  | KEGG PURINE METABOLISM                                                              | -2.06 | 0.0000  | 0.0007 | 151           | Depletion |
| 8  | KEGG ONE CARBON POOL BY FOLATE                                                      | -2.02 | 0.0000  | 0.0016 | 17            | Depletion |
| 9  | KEGG MTOR SIGNALING PATHWAY                                                         | -1.98 | 0.0000  | 0.0032 | 52            | Depletion |
| 10 | KEGG T CELL RECEPTOR SIGNALING PATHWAY                                              | -1.89 | 0.0000  | 0.0079 | 107           | Depletion |
| 11 | KEGG PRIMARY IMMUNODEFICIENCY                                                       | -1.79 | 0.0036  | 0.0248 | 35            | Depletion |
| 12 | KEGG PROTEASOME                                                                     | -1.78 | 0.0017  | 0.0253 | 44            | Depletion |
| 13 | KEGG NICOTINATE AND NICOTINAMIDE METABOLISM                                         | -1.71 | 0.0072  | 0.0463 | 24            | Depletion |
| 14 | KEGG CITRATE CYCLE TCA CYCLE                                                        | -1.69 | 0.0104  | 0.0520 | 30            | Depletion |
| 15 | KEGG CIRCADIAN RHYTHM MAMMAL                                                        | -1.64 | 0.0154  | 0.0753 | 12            | Depletion |
| 16 | KEGG CHRONIC MYELOID LEUKEMIA                                                       | -1.63 | 0.0053  | 0.0729 | 73            | Depletion |
| 17 | KEGG AMINO SUGAR AND NUCLEOTIDE SUGAR METABOLISM                                    | -1.63 | 0.0055  | 0.0716 | 43            | Depletion |
| 18 | KEGG INSULIN SIGNALING PATHWAY                                                      | -1.63 | 0.0000  | 0.0692 | 135           | Depletion |
| 19 | KEGG GLUTATHIONE METABOLISM                                                         | -1.59 | 0.0103  | 0.0935 | 47            | Depletion |
| 20 | KEGG ALANINE ASPARTATE AND GLUTAMATE METABOLISM                                     | -1.56 | 0.0351  | 0.1096 | 32            | Depletion |
| 21 | KEGG PROGESTERONE MEDIATED OOCYTE MATURATION                                        | -1.52 | 0.0134  | 0.1426 | 85            | Depletion |
| 22 | KEGG GLYCOLYSIS GLUCONEOGENESIS                                                     | -1.51 | 0.0173  | 0.1545 | 60            | Depletion |
| 23 | KEGG SELENOAMINO ACID METABOLISM                                                    | -1.50 | 0.0407  | 0.1507 | 26            | Depletion |
| 24 | KEGG NEUROTROPHIN SIGNALING PATHWAY                                                 | -1.48 | 0.0103  | 0.1725 | 124           | ns        |
| 25 | KEGG PANTOTHENATE AND COA BIOSYNTHESIS                                              | -1.48 | 0.0514  | 0.1682 | 16            | ns        |
| 26 | KEGG ACUTE MYELOID LEUKEMIA                                                         | -1.48 | 0.0227  | 0.1641 | 57            | ns        |
| 27 | KEGG ADIPOCYTOKINE SIGNALING PATHWAY                                                | -1.46 | 0.0230  | 0.1862 | 67            | ns        |
| 28 | KEGG FOLATE BIOSYNTHESIS                                                            | -1.44 | 0.0718  | 0.2008 | 11            | ns        |
| 29 | KEGG APOPTOSIS                                                                      | -1.44 | 0.0149  | 0.1983 | 86            | ns        |
| 30 | KEGG AMINOACYL TRNA BIOSYNTHESIS                                                    | -1.39 | 0.0653  | 0.2630 | 41            | ns        |
| 31 | KEGG NON HOMOLOGOUS END JOINING                                                     | -1.38 | 0.1103  | 0.2651 | 12            | ns        |
| 32 | KEGG CELL CYCLE                                                                     | -1.38 | 0.0283  | 0.2664 | 123           | ns        |
| 33 | KEGG CARDIAC MUSCLE CONTRACTION                                                     | -1.37 | 0.0429  | 0.2715 | 73            | ns        |
| 34 | KEGG VALINE LEUCINE AND ISOLEUCINE BIOSYNTHESIS                                     | -1.37 | 0.1209  | 0.2645 | 11            | ns        |
| 35 | KEGG ENDOCYTOSIS                                                                    | -1.36 | 0.0289  | 0.2675 | 173           | ns        |
| 36 | KEGG TYPE II DIABETES MELLITUS                                                      | -1.35 | 0.0771  | 0.2806 | 47            | ns        |
| 37 | KEGG COLORECTAL CANCER                                                              | -1.35 | 0.0678  | 0.2774 | 62            | ns        |
| 38 | KEGG TIGHT JUNCTION                                                                 | -1.34 | 0.0331  | 0.2855 | 130           | ns        |
| 39 | KEGG ENDOMETRIAL CANCER                                                             | -1.34 | 0.0672  | 0.2806 | 52            | ns        |
| 40 | KEGG AMYOTROPHIC LATERAL SCLEROSIS ALS                                              | -1.34 | 0.0914  | 0.2819 | 52            | ns        |
| 41 | KEGG SPHINGOLIPID METABOLISM                                                        | -1.32 | 0.0908  | 0.3046 | 39            | ns        |
| 42 | KEGG WNT SIGNALING PATHWAY                                                          | -1.31 | 0.0397  | 0.3185 | 149           | ns        |
| 43 | KEGG JAK STAT SIGNALING PATHWAY                                                     | -1.30 | 0.0497  | 0.3229 | 154           | ns        |
| 44 | KEGG NON SMALL CELL LUNG CANCER                                                     | -1.29 | 0.1028  | 0.3489 | 54            | ns        |
| 45 | KEGG VIBRIO CHOLERAEE INFECTION                                                     | -1.28 | 0.1194  | 0.3466 | 53            | ns        |
| 46 | KEGG ARACHIDONIC ACID METABOLISM                                                    | -1.27 | 0.1171  | 0.3753 | 56            | ns        |
| 47 | KEGG SMALL CELL LUNG CANCER                                                         | -1.26 | 0.0989  | 0.3818 | 84            | ns        |
| 48 | KEGG LEUKOCYTE TRANSENDOTHELIAL MIGRATION                                           | -1.26 | 0.1015  | 0.3834 | 114           | ns        |
| 49 | KEGG OOCYTE MEIOSIS                                                                 | -1.25 | 0.0929  | 0.3781 | 112           | ns        |
| 50 | KEGG PROXIMAL TUBULE BICARBONATE RECLAMATION                                        | -1.25 | 0.1624  | 0.3807 | 22            | ns        |
| 51 | KEGG VEGF SIGNALING PATHWAY                                                         | -1.24 | 0.1350  | 0.3930 | 74            | ns        |
| 52 | KEGG GLIOMA                                                                         | -1.23 | 0.1507  | 0.4167 | 65            | ns        |
| 53 | KEGG CYTOSOLIC DNA SENSING PATHWAY                                                  | -1.21 | 0.1664  | 0.4463 | 55            | ns        |
| 54 | KEGG TERPENOID BACKBONE BIOSYNTHESIS                                                | -1.20 | 0.2336  | 0.4565 | 15            | ns        |
| 55 | KEGG TYPE I DIABETES MELLITUS                                                       | -1.20 | 0.2199  | 0.4616 | 23            | ns        |
| 56 | KEGG RIG I LIKE RECEPTOR SIGNALING PATHWAY                                          | -1.19 | 0.1807  | 0.4670 | 70            | ns        |
| 57 | KEGG HEMATOPOIETIC CELL LINEAGE                                                     | -1.19 | 0.1794  | 0.4624 | 82            | ns        |
| 58 | KEGG PRION DISEASES                                                                 | -1.18 | 0.2331  | 0.4808 | 34            | ns        |
| 59 | KEGG GLYCOSPHINGOLIPID BIOSYNTHESIS GANGLIO SERIES                                  | -1.17 | 0.2613  | 0.5102 | 15            | ns        |
| 60 | KEGG RENAL CELL CARCINOMA                                                           | -1.17 | 0.2174  | 0.5041 | 70            | ns        |
| 61 | KEGG PROPANOATE METABOLISM                                                          | -1.16 | 0.2542  | 0.4984 | 31            | ns        |
| 62 | KEGG BASE EXCISION REPAIR                                                           | -1.16 | 0.2384  | 0.4971 | 33            | ns        |
| 63 | KEGG FC EPSILON RI SIGNALING PATHWAY                                                | -1.16 | 0.1868  | 0.4913 | 76            | ns        |

| #   | Gene set enrichment for CERES dependency of T-ALL vs. all other nonT-ALL cell lines | NES   | P-value | FDR    | Size gene set | Status |
|-----|-------------------------------------------------------------------------------------|-------|---------|--------|---------------|--------|
| 64  | KEGG PANCREATIC CANCER                                                              | -1.15 | 0.2164  | 0.5010 | 70            | ns     |
| 65  | KEGG DNA REPLICATION                                                                | -1.14 | 0.2381  | 0.5273 | 34            | ns     |
| 66  | KEGG PENTOSE PHOSPHATE PATHWAY                                                      | -1.14 | 0.2676  | 0.5253 | 26            | ns     |
| 67  | KEGG EPITHELIAL CELL SIGNALING IN HELICOBACTER PYLORI INF                           | -1.12 | 0.2542  | 0.5636 | 67            | ns     |
| 68  | KEGG GNRH SIGNALING PATHWAY                                                         | -1.12 | 0.2541  | 0.5704 | 99            | ns     |
| 69  | KEGG INTESTINAL IMMUNE NETWORK FOR IGA PRODUCTION                                   | -1.11 | 0.3114  | 0.5629 | 31            | ns     |
| 70  | KEGG PORPHYRIN AND CHLOROPHYLL METABOLISM                                           | -1.11 | 0.2855  | 0.5566 | 41            | ns     |
| 71  | KEGG PATHWAYS IN CANCER                                                             | -1.11 | 0.1982  | 0.5532 | 323           | ns     |
| 72  | KEGG P53 SIGNALING PATHWAY                                                          | -1.11 | 0.2694  | 0.5498 | 67            | ns     |
| 73  | KEGG BASAL CELL CARCINOMA                                                           | -1.10 | 0.2974  | 0.5594 | 55            | ns     |
| 74  | KEGG LYSOSOME                                                                       | -1.09 | 0.2913  | 0.5804 | 121           | ns     |
| 75  | KEGG THYROID CANCER                                                                 | -1.09 | 0.3363  | 0.5827 | 29            | ns     |
| 76  | KEGG NATURAL KILLER CELL MEDIATED CYTOTOXICITY                                      | -1.08 | 0.3019  | 0.5881 | 126           | ns     |
| 77  | KEGG PHOSPHATIDYLINOSITOL SIGNALING SYSTEM                                          | -1.08 | 0.3092  | 0.6031 | 74            | ns     |
| 78  | KEGG HISTIDINE METABOLISM                                                           | -1.08 | 0.3482  | 0.5963 | 28            | ns     |
| 79  | KEGG OTHER GLYCAN DEGRADATION                                                       | -1.07 | 0.3783  | 0.5912 | 16            | ns     |
| 80  | KEGG TOLL LIKE RECEPTOR SIGNALING PATHWAY                                           | -1.07 | 0.3149  | 0.5976 | 102           | ns     |
| 81  | KEGG FC GAMMA R MEDIATED PHAGOCYTOSIS                                               | -1.06 | 0.3413  | 0.6050 | 94            | ns     |
| 82  | KEGG NEUROACTIVE LIGAND RECEPTOR INTERACTION                                        | -1.06 | 0.3201  | 0.6137 | 269           | ns     |
| 83  | KEGG ERBB SIGNALING PATHWAY                                                         | -1.04 | 0.3719  | 0.6535 | 87            | ns     |
| 84  | KEGG DORSO VENTRAL AXIS FORMATION                                                   | -1.03 | 0.3943  | 0.6661 | 24            | ns     |
| 85  | KEGG PROSTATE CANCER                                                                | -1.02 | 0.4235  | 0.6857 | 87            | ns     |
| 86  | KEGG VALINE LEUCINE AND ISOLEUCINE DEGRADATION                                      | -1.02 | 0.4556  | 0.6907 | 43            | ns     |
| 87  | KEGG AXON GUIDANCE                                                                  | -1.02 | 0.4078  | 0.6849 | 127           | ns     |
| 88  | KEGG VASCULAR SMOOTH MUSCLE CONTRACTION                                             | -1.01 | 0.4277  | 0.7037 | 113           | ns     |
| 89  | KEGG GLYOXYLATE AND DICARBOXYLATE METABOLISM                                        | -1.01 | 0.4597  | 0.6977 | 16            | ns     |
| 90  | KEGG UBIQUITIN MEDIATED PROTEOLYSIS                                                 | -1.00 | 0.4531  | 0.7052 | 133           | ns     |
| 91  | KEGG CYSTEINE AND METHIONINE METABOLISM                                             | -1.00 | 0.4590  | 0.7129 | 34            | ns     |
| 92  | KEGG DRUG METABOLISM OTHER ENZYMES                                                  | -0.99 | 0.4983  | 0.7243 | 51            | ns     |
| 93  | KEGG CHEMOKINE SIGNALING PATHWAY                                                    | -0.98 | 0.5215  | 0.7505 | 184           | ns     |
| 94  | KEGG ALDOSTERONE REGULATED SODIUM REABSORPTION                                      | -0.98 | 0.5000  | 0.7449 | 42            | ns     |
| 95  | KEGG ECM RECEPTOR INTERACTION                                                       | -0.97 | 0.5358  | 0.7436 | 84            | ns     |
| 96  | KEGG LONG TERM POTENTIATION                                                         | -0.97 | 0.5120  | 0.7419 | 70            | ns     |
| 97  | KEGG NOD LIKE RECEPTOR SIGNALING PATHWAY                                            | -0.97 | 0.5050  | 0.7389 | 62            | ns     |
| 98  | KEGG MELANOGENESIS                                                                  | -0.95 | 0.5653  | 0.7798 | 101           | ns     |
| 99  | KEGG INOSITOL PHOSPHATE METABOLISM                                                  | -0.94 | 0.5529  | 0.7923 | 53            | ns     |
| 100 | KEGG FOCAL ADHESION                                                                 | -0.92 | 0.6578  | 0.8381 | 196           | ns     |
| 101 | KEGG OLFACTORY TRANSDUCTION                                                         | -0.91 | 0.7401  | 0.8733 | 354           | ns     |
| 102 | KEGG NUCLEOTIDE EXCISION REPAIR                                                     | -0.90 | 0.6380  | 0.8921 | 44            | ns     |
| 103 | KEGG PRIMARY BILE ACID BIOSYNTHESIS                                                 | -0.89 | 0.6104  | 0.8863 | 16            | ns     |
| 104 | KEGG MAPK SIGNALING PATHWAY                                                         | -0.89 | 0.7450  | 0.8779 | 262           | ns     |
| 105 | KEGG REGULATION OF ACTIN CYTOSKELETON                                               | -0.89 | 0.7530  | 0.8891 | 207           | ns     |
| 106 | KEGG FRUCTOSE AND MANNOSE METABOLISM                                                | -0.88 | 0.6383  | 0.8912 | 33            | ns     |
| 107 | KEGG ARRHYTHMOGENIC RIGHT VENTRICULAR CARDIOMYOPATHY                                | -0.88 | 0.6972  | 0.8974 | 73            | ns     |
| 108 | KEGG VIRAL MYOCARDITIS                                                              | -0.87 | 0.6986  | 0.8976 | 50            | ns     |
| 109 | KEGG GLYCOSAMINOGLYCAN BIOSYNTHESIS CHONDROITIN SULFAT                              | -0.85 | 0.6885  | 0.9388 | 22            | ns     |
| 110 | KEGG ASTHMA                                                                         | -0.85 | 0.6892  | 0.9420 | 16            | ns     |
| 111 | KEGG GLYCEROLIPID METABOLISM                                                        | -0.84 | 0.7110  | 0.9422 | 48            | ns     |
| 112 | KEGG CELL ADHESION MOLECULES CAMS                                                   | -0.84 | 0.7909  | 0.9384 | 110           | ns     |
| 113 | KEGG CALCIUM SIGNALING PATHWAY                                                      | -0.84 | 0.8644  | 0.9367 | 176           | ns     |
| 114 | KEGG DILATED CARDIOMYOPATHY                                                         | -0.84 | 0.7905  | 0.9306 | 90            | ns     |
| 115 | KEGG HEDGEHOG SIGNALING PATHWAY                                                     | -0.84 | 0.7483  | 0.9235 | 56            | ns     |
| 116 | KEGG GALACTOSE METABOLISM                                                           | -0.84 | 0.7104  | 0.9169 | 26            | ns     |
| 117 | KEGG GLYCOSAMINOGLYCAN DEGRADATION                                                  | -0.84 | 0.6954  | 0.9092 | 21            | ns     |
| 118 | KEGG STARCH AND SUCROSE METABOLISM                                                  | -0.83 | 0.7553  | 0.9210 | 48            | ns     |
| 119 | KEGG PPAR SIGNALING PATHWAY                                                         | -0.81 | 0.8141  | 0.9454 | 69            | ns     |
| 120 | KEGG PATHOGENIC ESCHERICHIA COLI INFECTION                                          | -0.80 | 0.8307  | 0.9490 | 55            | ns     |
| 121 | KEGG TGF BETA SIGNALING PATHWAY                                                     | -0.80 | 0.8385  | 0.9447 | 84            | ns     |
| 122 | KEGG GAP JUNCTION                                                                   | -0.79 | 0.8711  | 0.9620 | 89            | ns     |
| 123 | KEGG HYPERTROPHIC CARDIOMYOPATHY HCM                                                | -0.77 | 0.9158  | 0.9819 | 83            | ns     |
| 124 | KEGG PYRUVATE METABOLISM                                                            | -0.76 | 0.8442  | 0.9861 | 40            | ns     |
| 125 | KEGG GLYCEROPHOSPHOLIPID METABOLISM                                                 | -0.75 | 0.9005  | 0.9856 | 75            | ns     |
| 126 | KEGG LEISHMANIA INFECTION                                                           | -0.74 | 0.9054  | 0.9938 | 57            | ns     |
| 127 | KEGG ETHER LIPID METABOLISM                                                         | -0.74 | 0.8668  | 0.9891 | 31            | ns     |
| 128 | KEGG COMPLEMENT AND COAGULATION CASCADES                                            | -0.73 | 0.9174  | 0.9874 | 67            | ns     |
| 129 | KEGG GLYCINE SERINE AND THREONINE METABOLISM                                        | -0.73 | 0.8521  | 0.9801 | 31            | ns     |
| 130 | KEGG TAURINE AND HYPOTAURINE METABOLISM                                             | -0.73 | 0.8296  | 0.9778 | 10            | ns     |
| 131 | KEGG GLYCOSPHINGOLIPID BIOSYNTHESIS GLOBO SERIES                                    | -0.71 | 0.8481  | 0.9849 | 14            | ns     |
| 132 | KEGG LINOLEIC ACID METABOLISM                                                       | -0.69 | 0.9052  | 0.9968 | 27            | ns     |
| 133 | KEGG GLYCOSPHINGOLIPID BIOSYNTHESIS LACTO AND NEOLACTO                              | -0.66 | 0.9345  | 1.0000 | 25            | ns     |
| 134 | KEGG RIBOFLAVIN METABOLISM                                                          | -0.65 | 0.9168  | 1.0000 | 16            | ns     |

| #   | Gene set enrichment for CERES dependency of T-ALL vs. all other nonT-ALL cell lines | NES   | P-value | FDR    | Size gene set | Status        |
|-----|-------------------------------------------------------------------------------------|-------|---------|--------|---------------|---------------|
| 135 | KEGG ALLOGRAFT REJECTION                                                            | -0.64 | 0.9358  | 1.0000 | 17            | ns            |
| 136 | KEGG CYTOKINE CYTOKINE RECEPTOR INTERACTION                                         | -0.63 | 1.0000  | 1.0000 | 260           | ns            |
| 137 | KEGG PHENYLALANINE METABOLISM                                                       | -0.58 | 0.9551  | 1.0000 | 17            | ns            |
| 138 | KEGG O GLYCAN BIOSYNTHESIS                                                          | -0.56 | 0.9915  | 1.0000 | 30            | ns            |
| 139 | KEGG GLYCOSAMINOGLYCAN BIOSYNTHESIS KERATAN SULFATE                                 | -0.54 | 0.9646  | 0.9998 | 15            | ns            |
| 140 | KEGG LIMONENE AND PINENE DEGRADATION                                                | -0.49 | 0.9943  | 0.9975 | 10            | ns            |
| 141 | KEGG AUTOIMMUNE THYROID DISEASE                                                     | 0.52  | 0.9930  | 0.9957 | 32            | ns            |
| 142 | KEGG TASTE TRANSDUCTION                                                             | 0.56  | 0.9953  | 1.0000 | 51            | ns            |
| 143 | KEGG BETA ALANINE METABOLISM                                                        | 0.60  | 0.9720  | 1.0000 | 22            | ns            |
| 144 | KEGG GRAFT VERSUS HOST DISEASE                                                      | 0.63  | 0.9080  | 1.0000 | 19            | ns            |
| 145 | KEGG MATURITY ONSET DIABETES OF THE YOUNG                                           | 0.64  | 0.9473  | 1.0000 | 23            | ns            |
| 146 | KEGG TYROSINE METABOLISM                                                            | 0.68  | 0.9455  | 1.0000 | 40            | ns            |
| 147 | KEGG ALPHA LINOLENIC ACID METABOLISM                                                | 0.72  | 0.8650  | 1.0000 | 17            | ns            |
| 148 | KEGG GLYCOSYLPHOSPHATIDYLINOSITOL GPI ANCHOR BIOSYNTHESIS                           | 0.77  | 0.8283  | 1.0000 | 25            | ns            |
| 149 | KEGG STEROID HORMONE BIOSYNTHESIS                                                   | 0.79  | 0.8614  | 1.0000 | 54            | ns            |
| 150 | KEGG PROTEIN EXPORT                                                                 | 0.81  | 0.7115  | 1.0000 | 23            | ns            |
| 151 | KEGG N GLYCAN BIOSYNTHESIS                                                          | 0.82  | 0.7978  | 1.0000 | 46            | ns            |
| 152 | KEGG BASAL TRANSCRIPTION FACTORS                                                    | 0.82  | 0.7387  | 1.0000 | 35            | ns            |
| 153 | KEGG BUTANOATE METABOLISM                                                           | 0.82  | 0.7581  | 1.0000 | 34            | ns            |
| 154 | KEGG RENIN ANGIOTENSIN SYSTEM                                                       | 0.86  | 0.6591  | 1.0000 | 16            | ns            |
| 155 | KEGG REGULATION OF AUTOPHAGY                                                        | 0.86  | 0.6697  | 1.0000 | 34            | ns            |
| 156 | KEGG VASOPRESSIN REGULATED WATER REABSORPTION                                       | 0.87  | 0.7002  | 1.0000 | 43            | ns            |
| 157 | KEGG SNARE INTERACTIONS IN VESICULAR TRANSPORT                                      | 0.87  | 0.6895  | 1.0000 | 37            | ns            |
| 158 | KEGG PENTOSE AND GLUCURONATE INTERCONVERSIONS                                       | 0.90  | 0.6253  | 1.0000 | 28            | ns            |
| 159 | KEGG LYSINE DEGRADATION                                                             | 0.92  | 0.6250  | 1.0000 | 44            | ns            |
| 160 | KEGG TRYPTOPHAN METABOLISM                                                          | 0.92  | 0.5763  | 1.0000 | 39            | ns            |
| 161 | KEGG LONG TERM DEPRESSION                                                           | 0.94  | 0.5682  | 1.0000 | 68            | ns            |
| 162 | KEGG ADHERENS JUNCTION                                                              | 0.94  | 0.5801  | 1.0000 | 72            | ns            |
| 163 | KEGG SULFUR METABOLISM                                                              | 0.96  | 0.5000  | 1.0000 | 12            | ns            |
| 164 | KEGG ABC TRANSPORTERS                                                               | 0.98  | 0.4766  | 0.9965 | 44            | ns            |
| 165 | KEGG ARGININE AND PROLINE METABOLISM                                                | 0.99  | 0.4813  | 0.9982 | 53            | ns            |
| 166 | KEGG FATTY ACID METABOLISM                                                          | 1.02  | 0.4165  | 0.9145 | 41            | ns            |
| 167 | KEGG BLADDER CANCER                                                                 | 1.03  | 0.4034  | 0.9043 | 42            | ns            |
| 168 | KEGG RNA DEGRADATION                                                                | 1.06  | 0.3399  | 0.8568 | 54            | ns            |
| 169 | KEGG ASCORBATE AND ALDARATE METABOLISM                                              | 1.06  | 0.3479  | 0.8732 | 25            | ns            |
| 170 | KEGG DRUG METABOLISM CYTOCHROME P450                                                | 1.07  | 0.3017  | 0.9077 | 68            | ns            |
| 171 | KEGG B CELL RECEPTOR SIGNALING PATHWAY                                              | 1.08  | 0.3077  | 0.9187 | 74            | ns            |
| 172 | KEGG MELANOMA                                                                       | 1.08  | 0.2738  | 0.9502 | 70            | ns            |
| 173 | KEGG PEROXISOME                                                                     | 1.10  | 0.2602  | 0.9324 | 78            | ns            |
| 174 | KEGG METABOLISM OF XENOBIOTICS BY CYTOCHROME P450                                   | 1.11  | 0.2389  | 0.9652 | 66            | ns            |
| 175 | KEGG GLYCOSAMINOGLYCAN BIOSYNTHESIS HEPARAN SULFATE                                 | 1.12  | 0.2908  | 0.9690 | 26            | ns            |
| 176 | KEGG STEROID BIOSYNTHESIS                                                           | 1.13  | 0.2712  | 1.0000 | 17            | ns            |
| 177 | KEGG RETINOL METABOLISM                                                             | 1.16  | 0.1953  | 0.9746 | 63            | ns            |
| 178 | KEGG BIOSYNTHESIS OF UNSATURATED FATTY ACIDS                                        | 1.17  | 0.2362  | 1.0000 | 22            | ns            |
| 179 | KEGG HOMOLOGOUS RECOMBINATION                                                       | 1.21  | 0.1956  | 0.9569 | 28            | ns            |
| 180 | KEGG ANTIGEN PROCESSING AND PRESENTATION                                            | 1.24  | 0.1359  | 0.9202 | 62            | ns            |
| 181 | KEGG NITROGEN METABOLISM                                                            | 1.34  | 0.1050  | 0.5734 | 23            | ns            |
| 182 | KEGG MISMATCH REPAIR                                                                | 1.38  | 0.1062  | 0.5539 | 23            | ns            |
| 183 | KEGG HUNTINGTONS DISEASE                                                            | 1.52  | 0.0000  | 0.2548 | 169           | ns            |
| 184 | KEGG ALZHEIMERS DISEASE                                                             | 1.74  | 0.0000  | 0.0549 | 157           | ns            |
| 185 | KEGG OXIDATIVE PHOSPHORYLATION                                                      | 1.93  | 0.0000  | 0.0091 | 116           | Proliferation |
| 186 | KEGG PARKINSONS DISEASE                                                             | 2.03  | 0.0000  | 0.0056 | 112           | Proliferation |

**Supplementary table 2B:** Genome-wide gene set enrichment results for Avana 19Q4 CERES dependency of T-ALL vs. nonT-ALL hematopoietic cell lines across the collection of KEGG pathways (MSigDB v7). Shown for each gene set are the normalized enrichment score (NES), the nominal P-value, the Benjamini-Hochberg False Discovery Rate (FDR), the size and the dependency status (depletion - negatively enriched, proliferation - positively enriched). Significance cutoffs: abs(NES) >1.5, nominal P-value < 0.10, FDR < 0.25.

| #  | Gene set enrichment for CERES dependency of T-ALL vs. other hematopoietic cell lines | NES   | P-value | FDR    | Size gene set | Status    |
|----|--------------------------------------------------------------------------------------|-------|---------|--------|---------------|-----------|
| 1  | KEGG_RIBOSOME                                                                        | -2.34 | 0.0000  | 0.0000 | 85            | Depletion |
| 2  | KEGG_SYSTEMIC_LUPUS_ERYTHEMATOSUS                                                    | -2.34 | 0.0000  | 0.0000 | 111           | Depletion |
| 3  | KEGG_PYRIMIDINE_METABOLISM                                                           | -2.11 | 0.0000  | 0.0009 | 93            | Depletion |
| 4  | KEGG_NOTCH_SIGNALING_PATHWAY                                                         | -2.10 | 0.0000  | 0.0010 | 47            | Depletion |
| 5  | KEGG_T_CELL_RECEPTOR_SIGNALING_PATHWAY                                               | -1.95 | 0.0000  | 0.0055 | 107           | Depletion |
| 6  | KEGG_RNA_POLYMERASE                                                                  | -1.94 | 0.0000  | 0.0054 | 26            | Depletion |
| 7  | KEGG_ONE_CARBON_POOL_BY_FOLATE                                                       | -1.88 | 0.0019  | 0.0105 | 17            | Depletion |
| 8  | KEGG_PRIMARY_IMMUNODEFICIENCY                                                        | -1.86 | 0.0000  | 0.0111 | 35            | Depletion |
| 9  | KEGG_SPLICEOSOME                                                                     | -1.84 | 0.0000  | 0.0125 | 124           | Depletion |
| 10 | KEGG_NON_HOMOLOGOUS_END_JOINING                                                      | -1.73 | 0.0118  | 0.0462 | 12            | Depletion |
| 11 | KEGG_PURINE_METABOLISM                                                               | -1.72 | 0.0016  | 0.0442 | 151           | Depletion |
| 12 | KEGG_ENDOMETRIAL_CANCER                                                              | -1.71 | 0.0017  | 0.0461 | 52            | Depletion |
| 13 | KEGG_INSULIN_SIGNALING_PATHWAY                                                       | -1.69 | 0.0000  | 0.0547 | 135           | Depletion |
| 14 | KEGG_CIRCADIAN_RHYTHM_MAMMAL                                                         | -1.64 | 0.0236  | 0.0776 | 12            | Depletion |
| 15 | KEGG_VALINE_LEUCINE_AND_ISOLEUCINE_BIOSYNTHESIS                                      | -1.56 | 0.0348  | 0.1423 | 11            | Depletion |
| 16 | KEGG_GLYCOLYSIS_GLUCCONEOGENESIS                                                     | -1.56 | 0.0085  | 0.1344 | 60            | Depletion |
| 17 | KEGG_NON_SMALL_CELL_LUNG_CANCER                                                      | -1.52 | 0.0137  | 0.1755 | 54            | Depletion |
| 18 | KEGG_TYPE_I_DIABETES_MELLITUS                                                        | -1.50 | 0.0366  | 0.1841 | 23            | Depletion |
| 19 | KEGG_NEUROTROPHIN_SIGNALING_PATHWAY                                                  | -1.48 | 0.0144  | 0.2087 | 124           | ns        |
| 20 | KEGG_CHRONIC_MYELOID_LEUKEMIA                                                        | -1.48 | 0.0179  | 0.2011 | 73            | ns        |
| 21 | KEGG_MTOR_SIGNALING_PATHWAY                                                          | -1.45 | 0.0342  | 0.2349 | 52            | ns        |
| 22 | KEGG_TIGHT_JUNCTION                                                                  | -1.45 | 0.0164  | 0.2318 | 130           | ns        |
| 23 | KEGG_LEUKOCYTE_TRANSENDOTHELIAL_MIGRATION                                            | -1.43 | 0.0179  | 0.2533 | 114           | ns        |
| 24 | KEGG_PROGESTERONE_MEDIATED_OOCYTE_MATURATION                                         | -1.41 | 0.0429  | 0.2705 | 85            | ns        |
| 25 | KEGG_GLYCOSPHINGOLIPID_BIOSYNTHESIS_GANGLIO_SERIES                                   | -1.40 | 0.0960  | 0.2812 | 15            | ns        |
| 26 | KEGG_RENAL_CELL_CARCINOMA                                                            | -1.39 | 0.0524  | 0.2986 | 70            | ns        |
| 27 | KEGG_DORSO_VENTRAL_AXIS_FORMATION                                                    | -1.35 | 0.0982  | 0.3651 | 24            | ns        |
| 28 | KEGG_VEGF_SIGNALING_PATHWAY                                                          | -1.34 | 0.0755  | 0.3838 | 74            | ns        |
| 29 | KEGG_SPHINGOLIPID_METABOLISM                                                         | -1.33 | 0.0930  | 0.3840 | 39            | ns        |
| 30 | KEGG_AMYOTROPHIC_LATERAL_SCLEROSIS_ALS                                               | -1.32 | 0.0914  | 0.4045 | 52            | ns        |
| 31 | KEGG_PROANOATE_METABOLISM                                                            | -1.30 | 0.1278  | 0.4408 | 31            | ns        |
| 32 | KEGG_COLORECTAL_CANCER                                                               | -1.29 | 0.0809  | 0.4510 | 62            | ns        |
| 33 | KEGG_NATURAL_KILLER_CELL_MEDIATED_CYTOTOXICITY                                       | -1.28 | 0.0625  | 0.4577 | 126           | ns        |
| 34 | KEGG_PENTOSE_PHOSPHATE_PATHWAY                                                       | -1.28 | 0.1687  | 0.4532 | 26            | ns        |
| 35 | KEGG_ERBB_SIGNALING_PATHWAY                                                          | -1.27 | 0.1007  | 0.4593 | 87            | ns        |
| 36 | KEGG_AMINO_SUGAR_AND_NUCLEOTIDE_SUGAR_METABOLISM                                     | -1.27 | 0.1376  | 0.4579 | 43            | ns        |
| 37 | KEGG_BASE_EXCISION_REPAIR                                                            | -1.26 | 0.1472  | 0.4564 | 33            | ns        |
| 38 | KEGG_ARRHYTHMOGENIC_RIGHT_VENTRICULAR_CARDIOMYOPATHY_ARVC                            | -1.25 | 0.1191  | 0.4675 | 73            | ns        |
| 39 | KEGG_THYROID_CANCER                                                                  | -1.25 | 0.1715  | 0.4579 | 29            | ns        |
| 40 | KEGG_WNT_SIGNALING_PATHWAY                                                           | -1.24 | 0.0937  | 0.4885 | 149           | ns        |
| 41 | KEGG_FOLATE_BIOSYNTHESIS                                                             | -1.24 | 0.2025  | 0.4813 | 11            | ns        |
| 42 | KEGG_ENDOCYTOSIS                                                                     | -1.23 | 0.0869  | 0.4856 | 173           | ns        |
| 43 | KEGG_HEMATOPOIETIC_CELL_LINEAGE                                                      | -1.22 | 0.1254  | 0.4874 | 82            | ns        |
| 44 | KEGG_GNRH_SIGNALING_PATHWAY                                                          | -1.22 | 0.1299  | 0.4819 | 99            | ns        |
| 45 | KEGG_ACUTE_MYELOID_LEUKEMIA                                                          | -1.22 | 0.1809  | 0.4856 | 57            | ns        |
| 46 | KEGG_PATHOGENIC_ESCHERICHIA_COLL_INFECTION                                           | -1.21 | 0.1536  | 0.4829 | 55            | ns        |
| 47 | KEGG_TYPE_II_DIABETES_MELLITUS                                                       | -1.21 | 0.1827  | 0.4892 | 47            | ns        |
| 48 | KEGG_AMINOACYL_TRNA_BIOSYNTHESIS                                                     | -1.19 | 0.1940  | 0.5296 | 41            | ns        |
| 49 | KEGG_APOPTOSIS                                                                       | -1.19 | 0.1734  | 0.5226 | 86            | ns        |
| 50 | KEGG_PROTEASOME                                                                      | -1.18 | 0.2313  | 0.5363 | 44            | ns        |
| 51 | KEGG_CITRATE_CYCLE_TCA_CYCLE                                                         | -1.18 | 0.2297  | 0.5340 | 30            | ns        |
| 52 | KEGG_VIBRIO_CHOLERAE_INFECTION                                                       | -1.17 | 0.2190  | 0.5490 | 53            | ns        |
| 53 | KEGG_EPITHELIAL_CELL_SIGNALING_IN_HELICOBACTER_PYLORI_INFECTION                      | -1.16 | 0.2117  | 0.5596 | 67            | ns        |
| 54 | KEGG_CELL_ADHESION_MOLECULES_CAMS                                                    | -1.15 | 0.2149  | 0.5779 | 110           | ns        |
| 55 | KEGG_FOCAL_ADHESION                                                                  | -1.15 | 0.1837  | 0.5747 | 196           | ns        |
| 56 | KEGG_PANTOTHENATE_AND_COA_BIOSYNTHESIS                                               | -1.15 | 0.3112  | 0.5675 | 16            | ns        |
| 57 | KEGG_GLYCOSAMINOGLYCAN_BIOSYNTHESIS_CHONDROITIN_SULFATE                              | -1.14 | 0.2673  | 0.5646 | 22            | ns        |
| 58 | KEGG_BASAL_CELL_CARCINOMA                                                            | -1.14 | 0.2309  | 0.5578 | 55            | ns        |
| 59 | KEGG_CARDIAC_MUSCLE_CONTRACTION                                                      | -1.11 | 0.2751  | 0.6365 | 73            | ns        |
| 60 | KEGG_NEUROACTIVE_LIGAND_RECEPTOR_INTERACTION                                         | -1.11 | 0.1991  | 0.6322 | 269           | ns        |
| 61 | KEGG_FC_EPSILON_RI_SIGNALING_PATHWAY                                                 | -1.11 | 0.2813  | 0.6290 | 76            | ns        |
| 62 | KEGG_DILATED_CARDIOMYOPATHY                                                          | -1.10 | 0.2768  | 0.6286 | 90            | ns        |
| 63 | KEGG_ARACHIDONIC_ACID_METABOLISM                                                     | -1.10 | 0.2913  | 0.6411 | 56            | ns        |
| 64 | KEGG_GLIOMA                                                                          | -1.10 | 0.2830  | 0.6334 | 65            | ns        |
| 65 | KEGG_HISTIDINE_METABOLISM                                                            | -1.09 | 0.3299  | 0.6386 | 28            | ns        |
| 66 | KEGG_UBIQUITIN_MEDIATED_PROTEOLYSIS                                                  | -1.09 | 0.3026  | 0.6336 | 133           | ns        |
| 67 | KEGG_SMALL_CELL_LUNG_CANCER                                                          | -1.09 | 0.2893  | 0.6242 | 84            | ns        |
| 68 | KEGG_OOCYTE_MEIOSIS                                                                  | -1.09 | 0.2750  | 0.6177 | 112           | ns        |
| 69 | KEGG_REGULATION_OF_ACTIN_CYTOSKELETON                                                | -1.09 | 0.2540  | 0.6120 | 207           | ns        |
| 70 | KEGG_JAK_STAT_SIGNALING_PATHWAY                                                      | -1.08 | 0.2809  | 0.6134 | 154           | ns        |
| 71 | KEGG_PRION_DISEASES                                                                  | -1.08 | 0.3351  | 0.6105 | 34            | ns        |
| 72 | KEGG_PATHWAYS_IN_CANCER                                                              | -1.08 | 0.2707  | 0.6060 | 323           | ns        |
| 73 | KEGG_FC_GAMMA_R_MEDIATED_PHAGOCYTOSIS                                                | -1.08 | 0.3072  | 0.6093 | 94            | ns        |
| 74 | KEGG_OTHER_GLYCAN_DEGRADATION                                                        | -1.07 | 0.3766  | 0.6122 | 16            | ns        |
| 75 | KEGG_ADHERENS_JUNCTION                                                               | -1.07 | 0.3226  | 0.6080 | 72            | ns        |
| 76 | KEGG_INTESTINAL_IMMUNE_NETWORK_FOR_IGA_PRODUCTION                                    | -1.06 | 0.3849  | 0.6177 | 31            | ns        |

|     |                                                               |       |        |        |     |    |
|-----|---------------------------------------------------------------|-------|--------|--------|-----|----|
| 77  | KEGG_GLYCOSYLPHOSPHATIDYLINOSITOL_GPI_ANCHOR_BIOSYNTHESIS     | -1.06 | 0.3689 | 0.6313 | 25  | ns |
| 78  | KEGG_GAP_JUNCTION                                             | -1.04 | 0.3748 | 0.6684 | 89  | ns |
| 79  | KEGG_STARCH_AND_SUCROSE_METABOLISM                            | -1.02 | 0.4271 | 0.7049 | 48  | ns |
| 80  | KEGG_INOSITOL_PHOSPHATE_METABOLISM                            | -1.02 | 0.4278 | 0.7037 | 53  | ns |
| 81  | KEGG_DNA_REPLICATION                                          | -1.02 | 0.4403 | 0.7015 | 34  | ns |
| 82  | KEGG_NICOTINATE_AND_NICOTINAMIDE_METABOLISM                   | -1.02 | 0.4317 | 0.6945 | 24  | ns |
| 83  | KEGG_VIRAL_MYOCARDITIS                                        | -1.02 | 0.4273 | 0.6896 | 50  | ns |
| 84  | KEGG_ECM_RECEPTOR_INTERACTION                                 | -1.01 | 0.4202 | 0.6941 | 84  | ns |
| 85  | KEGG_RNA_DEGRADATION                                          | -1.00 | 0.4541 | 0.7126 | 54  | ns |
| 86  | KEGG_ALDOSTERONE_REGULATED_SODIUM_REABSORPTION                | -1.00 | 0.4744 | 0.7113 | 42  | ns |
| 87  | KEGG_SELENOAMINO_ACID_METABOLISM                              | -1.00 | 0.4729 | 0.7126 | 26  | ns |
| 88  | KEGG_PHOSPHATIDYLINOSITOL_SIGNALING_SYSTEM                    | -0.98 | 0.4749 | 0.7353 | 74  | ns |
| 89  | KEGG_HYPERTROPHIC_CARDIOMYOPATHY_HCM                          | -0.98 | 0.4737 | 0.7308 | 83  | ns |
| 90  | KEGG_DRUG_METABOLISM_OTHER_ENZYMES                            | -0.97 | 0.5050 | 0.7454 | 51  | ns |
| 91  | KEGG_CALCIIUM_SIGNALING_PATHWAY                               | -0.97 | 0.4907 | 0.7377 | 176 | ns |
| 92  | KEGG_PPAR_SIGNALING_PATHWAY                                   | -0.97 | 0.5315 | 0.7355 | 69  | ns |
| 93  | KEGG_CHEMOKINE_SIGNALING_PATHWAY                              | -0.96 | 0.5357 | 0.7488 | 184 | ns |
| 94  | KEGG_VALINE_LEUCINE_AND_ISOLEUCINE_DEGRADATION                | -0.96 | 0.5068 | 0.7433 | 43  | ns |
| 95  | KEGG_ALANINE_ASPARTATE_AND_Glutamate_METABOLISM               | -0.96 | 0.5288 | 0.7515 | 32  | ns |
| 96  | KEGG_LYSOSOME                                                 | -0.95 | 0.5556 | 0.7570 | 121 | ns |
| 97  | KEGG_RIG_I_LIKE_RECEPTOR_SIGNALING_PATHWAY                    | -0.95 | 0.5497 | 0.7634 | 70  | ns |
| 98  | KEGG_GLYCEROLIPID_METABOLISM                                  | -0.94 | 0.5423 | 0.7644 | 48  | ns |
| 99  | KEGG_Glutathione_METABOLISM                                   | -0.94 | 0.5538 | 0.7644 | 47  | ns |
| 100 | KEGG_CYTOSOLIC_DNA_SENSING_PATHWAY                            | -0.93 | 0.5960 | 0.7943 | 55  | ns |
| 101 | KEGG_VASCULAR_SMOOTH_MUSCLE_CONTRACTION                       | -0.92 | 0.6353 | 0.7925 | 113 | ns |
| 102 | KEGG_LONG_TERM_POTENTIATION                                   | -0.90 | 0.6623 | 0.8411 | 70  | ns |
| 103 | KEGG_GLYCOSAMINOGLYCAN_DEGRADATION                            | -0.89 | 0.6474 | 0.8619 | 21  | ns |
| 104 | KEGG_MELANOGENESIS                                            | -0.89 | 0.7107 | 0.8567 | 101 | ns |
| 105 | KEGG_AXON_GUIDANCE                                            | -0.88 | 0.7351 | 0.8661 | 127 | ns |
| 106 | KEGG_GALACTOSE_METABOLISM                                     | -0.88 | 0.6445 | 0.8657 | 26  | ns |
| 107 | KEGG_TOLL_LIKE_RECEPTOR_SIGNALING_PATHWAY                     | -0.87 | 0.7324 | 0.8823 | 102 | ns |
| 108 | KEGG_MAPK_SIGNALING_PATHWAY                                   | -0.86 | 0.8655 | 0.8921 | 262 | ns |
| 109 | KEGG_PRIMARY_BILE_ACID_BIOSYNTHESIS                           | -0.85 | 0.6705 | 0.9128 | 16  | ns |
| 110 | KEGG_HEDGEHOG_SIGNALING_PATHWAY                               | -0.84 | 0.7374 | 0.9090 | 56  | ns |
| 111 | KEGG_COMPLEMENT_AND_COAGULATION_CASCADES                      | -0.83 | 0.7785 | 0.9250 | 67  | ns |
| 112 | KEGG_FRUCTOSE_AND_MANNOSE_METABOLISM                          | -0.83 | 0.7569 | 0.9300 | 33  | ns |
| 113 | KEGG_GLYCOSAMINOGLYCAN_BIOSYNTHESIS_KERATAN_SULFATE           | -0.82 | 0.7253 | 0.9349 | 15  | ns |
| 114 | KEGG_CYSTEINE_AND_METHIONINE_METABOLISM                       | -0.80 | 0.8007 | 0.9557 | 34  | ns |
| 115 | KEGG_NOD_LIKE_RECEPTOR_SIGNALING_PATHWAY                      | -0.80 | 0.8223 | 0.9567 | 62  | ns |
| 116 | KEGG_PYRUVATE_METABOLISM                                      | -0.79 | 0.8304 | 0.9605 | 40  | ns |
| 117 | KEGG_GLYCOSAMINOGLYCAN_BIOSYNTHESIS_HEPARAN_SULFATE           | -0.78 | 0.7969 | 0.9710 | 26  | ns |
| 118 | KEGG_PROXIMAL_TUBULE_BICARBONATE_RECLAMATION                  | -0.76 | 0.8301 | 0.9950 | 22  | ns |
| 119 | KEGG_TERPENOID_BACKBONE_BIOSYNTHESIS                          | -0.76 | 0.8007 | 0.9878 | 15  | ns |
| 120 | KEGG_ASTHMA                                                   | -0.76 | 0.8103 | 0.9799 | 16  | ns |
| 121 | KEGG_LINOLEIC_ACID_METABOLISM                                 | -0.75 | 0.8175 | 0.9800 | 27  | ns |
| 122 | KEGG_PROTEIN_EXPORT                                           | -0.74 | 0.8316 | 0.9810 | 23  | ns |
| 123 | KEGG_OLFACTORY_TRANSDUCTION                                   | -0.72 | 1.0000 | 0.9973 | 354 | ns |
| 124 | KEGG_GLYCOSPHINGOLIPID_BIOSYNTHESIS_GLOBO_SERIES              | -0.71 | 0.8606 | 0.9986 | 14  | ns |
| 125 | KEGG_TAURINE_AND_HYPOTAURINE_METABOLISM                       | -0.68 | 0.8495 | 1.0000 | 10  | ns |
| 126 | KEGG_MATURITY_ONSET_DIABETES_OF_THE_YOUNG                     | -0.67 | 0.9180 | 1.0000 | 23  | ns |
| 127 | KEGG_LIMONENE_AND_PINENE_DEGRADATION                          | -0.64 | 0.8916 | 1.0000 | 10  | ns |
| 128 | KEGG_CYTOKINE_CYTOKINE_RECEPTOR_INTERACTION                   | -0.63 | 1.0000 | 1.0000 | 260 | ns |
| 129 | KEGG_O_GLYCAN_BIOSYNTHESIS                                    | -0.62 | 0.9654 | 1.0000 | 30  | ns |
| 130 | KEGG_PHENYLALANINE_METABOLISM                                 | -0.59 | 0.9468 | 1.0000 | 17  | ns |
| 131 | KEGG_GLYCOSPHINGOLIPID_BIOSYNTHESIS_LACTO_AND_NEOLACTO_SERIES | -0.58 | 0.9583 | 1.0000 | 25  | ns |
| 132 | KEGG_ALLOGRAFT_REJECTION                                      | -0.57 | 0.9484 | 1.0000 | 17  | ns |
| 133 | KEGG_ETHER_LIPID_METABOLISM                                   | -0.48 | 0.9930 | 1.0000 | 31  | ns |
| 134 | KEGG_AUTOIMMUNE_THYROID_DISEASE                               | -0.43 | 1.0000 | 0.9994 | 32  | ns |
| 135 | KEGG_GRAFT_VERSUS_HOST_DISEASE                                | 0.54  | 0.9882 | 0.9935 | 19  | ns |
| 136 | KEGG_ALPHA_LINOLENIC_ACID_METABOLISM                          | 0.55  | 0.9750 | 1.0000 | 17  | ns |
| 137 | KEGG_REGULATION_OF_AUTOPHAGY                                  | 0.59  | 0.9900 | 1.0000 | 34  | ns |
| 138 | KEGG_BETA_ALANINE_METABOLISM                                  | 0.62  | 0.9497 | 1.0000 | 22  | ns |
| 139 | KEGG_TASTE_TRANSDUCTION                                       | 0.64  | 0.9747 | 1.0000 | 51  | ns |
| 140 | KEGG_TYROSINE_METABOLISM                                      | 0.66  | 0.9500 | 1.0000 | 40  | ns |
| 141 | KEGG_GLYOXYLATE_AND_DICARBOXYLATE_METABOLISM                  | 0.67  | 0.8901 | 1.0000 | 16  | ns |
| 142 | KEGG_GLYCINE_SERINE_AND_THREONINE_METABOLISM                  | 0.67  | 0.9310 | 1.0000 | 31  | ns |
| 143 | KEGG_SULFUR_METABOLISM                                        | 0.70  | 0.8531 | 1.0000 | 12  | ns |
| 144 | KEGG_RENIN_ANGIOTENSIN_SYSTEM                                 | 0.73  | 0.8562 | 1.0000 | 16  | ns |
| 145 | KEGG_BIOSYNTHESIS_OF_UNSATURATED_FATTY_ACIDS                  | 0.77  | 0.7894 | 1.0000 | 22  | ns |
| 146 | KEGG_BUTANOATE_METABOLISM                                     | 0.79  | 0.7799 | 1.0000 | 34  | ns |
| 147 | KEGG_TRYPTOPHAN_METABOLISM                                    | 0.82  | 0.7917 | 1.0000 | 39  | ns |
| 148 | KEGG_STEROID_HORMONE_BIOSYNTHESIS                             | 0.82  | 0.7735 | 1.0000 | 54  | ns |
| 149 | KEGG_LEISHMANIA_INFECTION                                     | 0.84  | 0.7767 | 1.0000 | 57  | ns |
| 150 | KEGG_RIBOFLAVIN_METABOLISM                                    | 0.87  | 0.6625 | 1.0000 | 16  | ns |
| 151 | KEGG_GLYCEROPHOSPHOLIPID_METABOLISM                           | 0.89  | 0.7062 | 0.9775 | 75  | ns |
| 152 | KEGG_NUCLEOTIDE_EXCISION_REPAIR                               | 0.91  | 0.6115 | 0.9255 | 44  | ns |
| 153 | KEGG_ABC_TRANSPORTERS                                         | 0.93  | 0.5925 | 0.9104 | 44  | ns |
| 154 | KEGG_DRUG_METABOLISM_CYTOCHROME_P450                          | 0.93  | 0.5873 | 0.9260 | 68  | ns |
| 155 | KEGG_SNARE_INTERACTIONS_IN_VESICULAR_TRANSPORT                | 0.94  | 0.5760 | 0.9259 | 37  | ns |
| 156 | KEGG_LONG_TERM_DEPRESSION                                     | 0.94  | 0.5895 | 0.9531 | 68  | ns |
| 157 | KEGG_PENTOSE_AND_GLUUCURONATE_INTERCONVERSIONS                | 0.95  | 0.5249 | 0.9466 | 28  | ns |
| 158 | KEGG_BLADDER_CANCER                                           | 0.97  | 0.5286 | 0.9271 | 42  | ns |
| 159 | KEGG_FATTY_ACID_METABOLISM                                    | 1.00  | 0.4679 | 0.8255 | 41  | ns |
| 160 | KEGG_ASCORBATE_AND_ALDARATE_METABOLISM                        | 1.01  | 0.4289 | 0.8481 | 25  | ns |
| 161 | KEGG_N_GLYCAN_BIOSYNTHESIS                                    | 1.01  | 0.4069 | 0.8787 | 46  | ns |
| 162 | KEGG_MELANOMA                                                 | 1.02  | 0.4179 | 0.8702 | 70  | ns |
| 163 | KEGG_P53_SIGNALING_PATHWAY                                    | 1.06  | 0.3302 | 0.7390 | 67  | ns |
| 164 | KEGG_METABOLISM_OF_XENOBIOTICS_BY_CYTOCHROME_P450             | 1.08  | 0.2965 | 0.7037 | 66  | ns |

|     |                                               |      |        |        |     |               |
|-----|-----------------------------------------------|------|--------|--------|-----|---------------|
| 165 | KEGG_HOMOLOGOUS_RECOMBINATION                 | 1.13 | 0.2873 | 0.5962 | 28  | ns            |
| 166 | KEGG_ADIPOCYTOKINE_SIGNALING_PATHWAY          | 1.15 | 0.2214 | 0.5667 | 67  | ns            |
| 167 | KEGG_VASOPRESSIN_REGULATED_WATER_REABSORPTION | 1.16 | 0.2350 | 0.5652 | 43  | ns            |
| 168 | KEGG_PROSTATE_CANCER                          | 1.16 | 0.1830 | 0.5816 | 87  | ns            |
| 169 | KEGG_PEROXISOME                               | 1.16 | 0.2075 | 0.6092 | 78  | ns            |
| 170 | KEGG_TGF_BETA_SIGNALING_PATHWAY               | 1.21 | 0.1342 | 0.4991 | 84  | ns            |
| 171 | KEGG_PORPHYRIN_AND_CHLOROPHYLL_METABOLISM     | 1.21 | 0.1627 | 0.5257 | 41  | ns            |
| 172 | KEGG_BASAL_TRANSCRIPTION_FACTORS              | 1.23 | 0.1736 | 0.4982 | 35  | ns            |
| 173 | KEGG_ARGININE_AND_PROLINE_METABOLISM          | 1.24 | 0.1214 | 0.5172 | 53  | ns            |
| 174 | KEGG_STEROID_BIOSYNTHESIS                     | 1.24 | 0.1827 | 0.5539 | 17  | ns            |
| 175 | KEGG_RETINOL_METABOLISM                       | 1.26 | 0.1148 | 0.5258 | 63  | ns            |
| 176 | KEGG_LYSINE_DEGRADATION                       | 1.29 | 0.1065 | 0.4945 | 44  | ns            |
| 177 | KEGG_ANTIGEN_PROCESSING_AND_PRESENTATION      | 1.31 | 0.0878 | 0.4806 | 62  | ns            |
| 178 | KEGG_B_CELL_RECEPTOR_SIGNALING_PATHWAY        | 1.33 | 0.0469 | 0.4640 | 74  | ns            |
| 179 | KEGG_PANCREATIC_CANCER                        | 1.35 | 0.0624 | 0.4647 | 70  | ns            |
| 180 | KEGG_CELL_CYCLE                               | 1.37 | 0.0351 | 0.4796 | 123 | ns            |
| 181 | KEGG_NITROGEN_METABOLISM                      | 1.42 | 0.0728 | 0.4092 | 23  | ns            |
| 182 | KEGG_ALZHEIMERS_DISEASE                       | 1.67 | 0.0028 | 0.0758 | 157 | Proliferation |
| 183 | KEGG_MISMATCH_REPAIR                          | 1.67 | 0.0142 | 0.0919 | 23  | Proliferation |
| 184 | KEGG_HUNTINGTONS_DISEASE                      | 1.70 | 0.0000 | 0.0925 | 169 | Proliferation |
| 185 | KEGG_OXIDATIVE_PHOSPHORYLATION                | 1.96 | 0.0000 | 0.0130 | 116 | Proliferation |
| 186 | KEGG_PARKINSONS_DISEASE                       | 2.07 | 0.0000 | 0.0056 | 112 | Proliferation |
